# Supplementary material for: Co/Cu-modified NiO film grown on nickel foam as a highly active and stable electrocatalyst for overall water splitting
Source: Royal Society of Chemistry journal article supplement (doi:10.1039/c9dt04771a), 2020-01-01
Supplement: c9dt04771a1.pdf [file c9dt04771a1.pdf]

Supporting Information

**Co/Cu-modified NiO film grown on nickel foam as a highly active  
and stable electrocatalyst for overall water splitting**

Zhengang Guo<sup>1,2\*</sup>, Xiaofeng Wang<sup>1</sup>, Yangqin Gao<sup>2</sup>, Zhifeng Liu<sup>1,2\*</sup>

<sup>1</sup>School of Materials Science and Engineering, Tianjin Chengjian University, Tianjin 300384, China

<sup>2</sup>Tianjin Key Laboratory of Building Green Functional Materials, Tianjin 300384, China

\* Corresponding Authors at: School of Materials Science and Engineering, Tianjin Chengjian University, 300384 Tianjin, China.

E-mail addresses: zhenganguo@126.com (Z. Guo), tjulzf@163.com (Z. Liu).

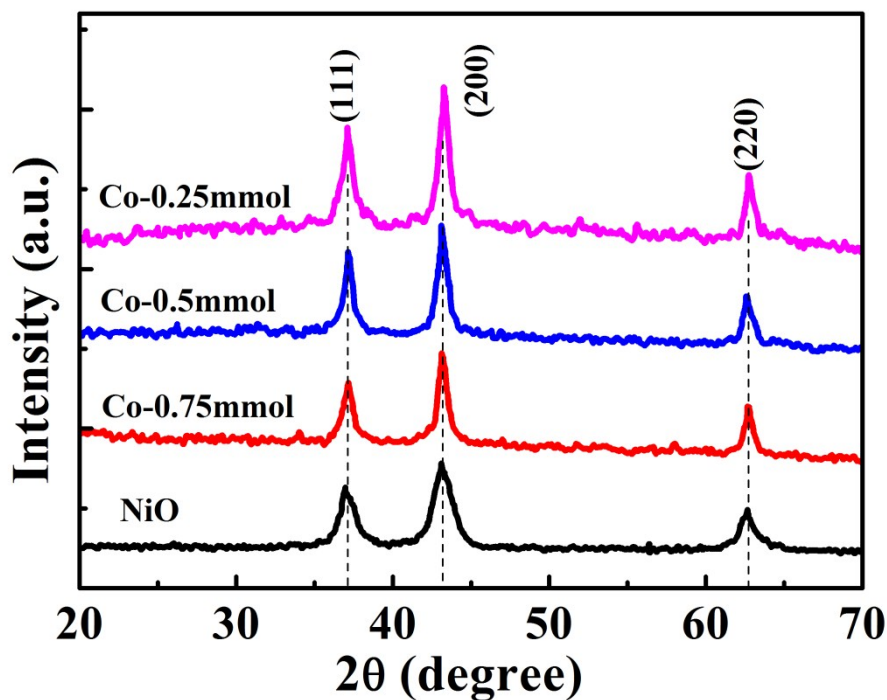

Fig.S1 The XRD patterns of NiO and Co-doped NiO powder samples peeled off the Ni foam, which correspond to the pure NiO, Co-doped NiO samples with addition of 0.25mmol, 0.5mmol and 0.75mmol Co source, respectively.

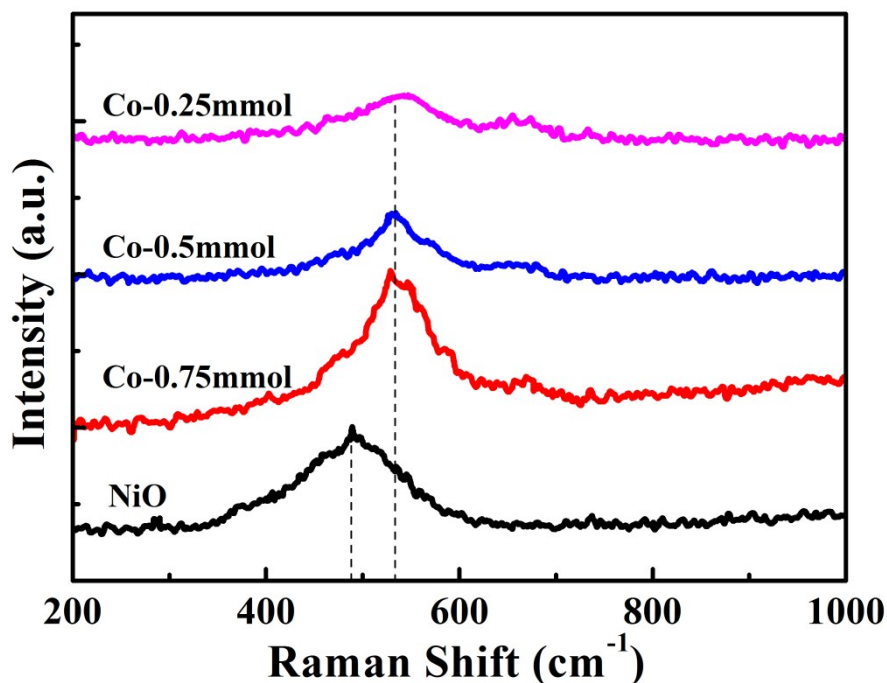

Fig.S2 The Raman spectra of NiO and Co-doped NiO powder samples peeled off the Ni foam, which correspond to the pure NiO, Co-doped NiO samples with addition of 0.25mmol, 0.5mmol and 0.75mmol Co source, respectively.
